# Supplementary material for: In situ synthesis and unidirectional insertion of membrane proteins in liposome-immobilized silica stationary phase for rapid preparation of microaffinity chromatography
Source: PubMed Central journal article supplement — Acta Pharm Sin B. 2022 Apr 22;12(9):3682–93. doi: 10.1016/j.apsb.2022.04.010 (PMC9513493; doi:10.1016/j.apsb.2022.04.010), 2022-04-22
Supplement: mmc1.pdf [file mmc1.pdf]

## Supporting Information for

### Original article

#### ***In situ* synthesis and unidirectional insertion of membrane proteins in liposome-immobilized silica stationary phase for rapid preparation of microaffinity chromatography**

Yanqiu Gu<sup>a,†</sup>, Rong Wang<sup>a,†</sup>, Panpan Chen<sup>a,†</sup>, Shengnan Li<sup>a</sup>, Xinyi Chai<sup>b,c</sup>, Chun Chen<sup>a</sup>, Yue Liu<sup>b,c</sup>, Yan Cao<sup>b,c</sup>, Diya Lv<sup>b,c</sup>, Zhanying Hong<sup>b,c</sup>, Zhenyu Zhu<sup>b,c</sup>, Yifeng Chai<sup>b,c,\*</sup>, Yongfang Yuan<sup>a,\*</sup>, Xiaofei Chen<sup>b,c,\*</sup>

<sup>a</sup>*Department of Pharmacy, Shanghai Ninth People's Hospital, Shanghai Jiao Tong University, School of Medicine, Shanghai 201999, China*

<sup>b</sup>*School of Pharmacy, Naval Medical University (Second Military Medical University), Shanghai 200433, China*

<sup>c</sup>*Shanghai Key Laboratory for Pharmaceutical Metabolite Research, Shanghai 200433, China*

Received 18 January 2022; received in revised form 13 March 2022; accepted 11 April 2022

<sup>†</sup>These authors made equal contributions to this work.

\*Corresponding author. Tel./fax: +86 21 81871393 (Yifeng Chai), +86 21 56691101 (Yongfang Yuan), +86 21 81871335 (Xiaofei Chen).

E-mail addresses: [yfchai@smmu.edu.cn](mailto:yfchai@smmu.edu.cn) (Yifeng Chai), [nmxyyf@126.com](mailto:nmxyyf@126.com) (Yongfang Yuan), [xfchen2010@163.com](mailto:xfchen2010@163.com) (Xiaofei Chen).

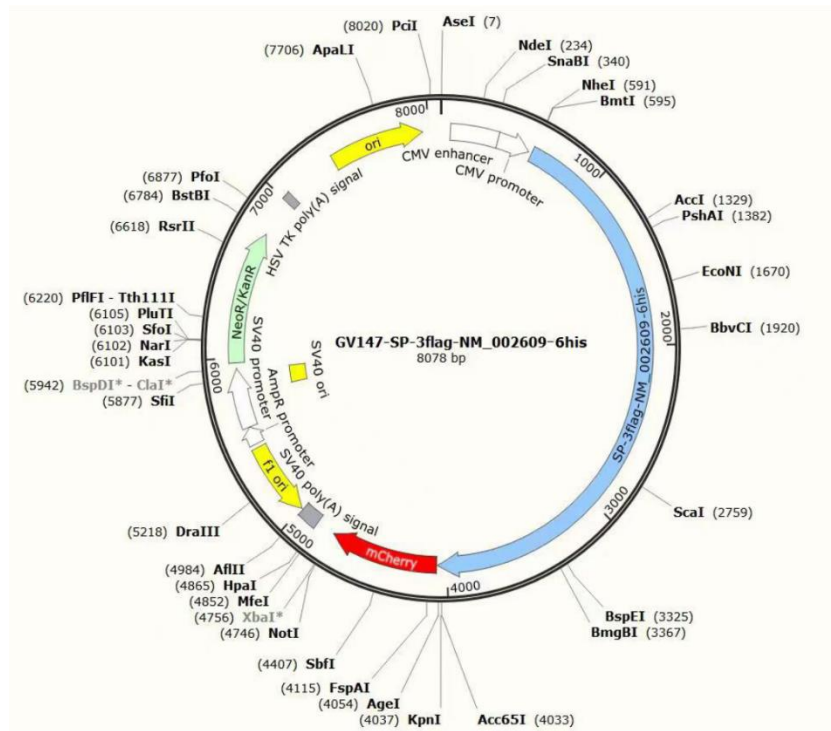

**Figure S1** Construction of plasmid template of PDGFR $\beta$ .

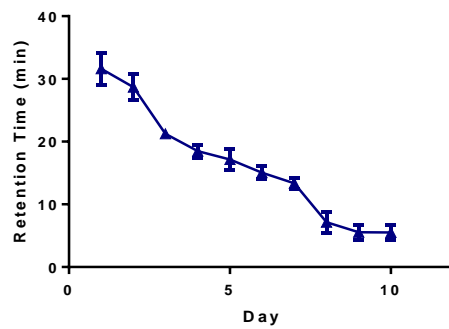

**Figure S2** RT of PDGF-BB on PDGFR $\beta$  columns within 10 days ( $n = 3$ ). (Life and repeatability).

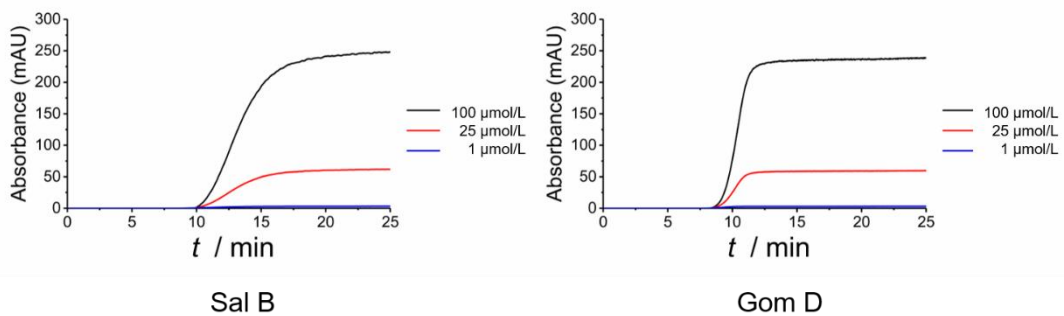

**Figure S3** Frontal affinity breakthrough curves on an empty-PDGFR $\beta$  column: (A) Sal B, (B) Gom D.

As observed, the reduced breakthrough time of Sal B and Gom D was constant regardless of the ligand concentration, which confirms non-specific interactions. From here,  $t_0$  of Sal B and Gom D were separately determined as 9.97 and 8.43 min.

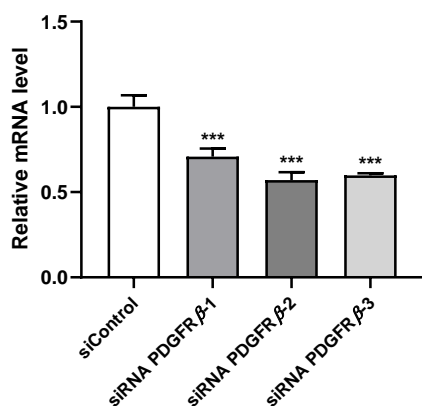

**Figure S4** Validation of PDGFR $\beta$  knockdown by siRNA PDGFR $\beta$  in HSC-T6 cells. Quantitative RT-PCR analysis of PDGFR $\beta$  mRNA expression after transfection with siRNA PDGFR $\beta$  in HSC-T6 cells,  $n=4$ . Data are shown as mean  $\pm$  SD. \*\*\* $P<0.001$  versus siControl group.

**Table S1** Sequences of RNAi assays.

| RNAi Name              | Species Specificity | Sequences           |
|------------------------|---------------------|---------------------|
| siRNA PDGFR $\beta$ -1 | Rat                 | CCGATACTTACTATGTCTA |
| siRNA PDGFR $\beta$ -2 | Rat                 | CAGCTAGAAACGAACGTGA |
| siRNA PDGFR $\beta$ -3 | Rat                 | GACCAGTTCTACAATGCCA |

**Table S2** Sequence of primers for quantitative RT-PCR analysis.

| Name                           | NCBI Gene ID | Species Specificity | Sequences of Primers                                                            |
|--------------------------------|--------------|---------------------|---------------------------------------------------------------------------------|
| <i>GAPDH</i>                   | 24383        | Rat                 | forward 5'- GACATGCCGCCTGGAGAAAC-3'<br>reverse 5'-AGCCCAGGATGCCCTTTAGT-3'       |
| <i><math>\alpha</math>-SMA</i> | 59086        | Rat                 | forward 5'-CCAGGGAGTGATGGTTGGA-3'<br>reverse 5'-CCGTTAGCAAGGTCGGATG-3'          |
| <i>collagen I</i>              | 29393        | Rat                 | forward 5'-TGTTGGTCCTGCTGGCAAGAATG-3'<br>reverse 5'-GTCACCTTGTTTCGCCTGTCTCAC-3' |
| <i>PDGFR<math>\beta</math></i> | 24629        | Rat                 | forward 5'-CTTGTCTGGGACGCACTCTTGG-3'<br>reverse 5'-GCTTCTCACTGCTTCTGGCTGTAG-3'  |
